# Supplementary material
Source: PubMed Central journal article supplement (PMC4321253)
Supplement: pnas.201417000SI.pdf [file pnas.201417000SI.pdf]

# Supporting Information

Cornelis et al. 10.1073/pnas.1417000112

## SI Methods

**Materials.** All specimens of opossum (*M. domestica*) females were available from a breeding group kept at the animal facility of the Institute of Systematic Zoology at the Humboldt Universität Berlin, Museum of Natural History. This was performed under registration of the responsible State Office of Health and Social Affairs Berlin (LaGeSo), Germany. Placental and uterine tissues were collected from pregnant females killed at several gestation times and either stored in liquid nitrogen or processed for ISH. Other tissues (uterus, embryo, muscle, heart liver, lung, kidney, spleen, bladder, intestine, and ovary) were collected from the same killed females and from a nonpregnant female. Total RNA was extracted from the frozen organs by using the RNeasy RNA isolation kit (Qiagen). Near-term tammar wallaby placental tissues were collected and processed by B. Menzies and M. Renfree (University of Melbourne). Genomic DNA from *M. domestica* was extracted from the frozen tissues of a pregnant female. Genomic DNA from *Macropus rufus*, *Dendrolagus matschiei*, and *Phascolarctos cinereus* were purified from blood samples collected by B. Mulot and R. Potier (ZooParc de Beauval and Beauval Nature, Saint Aignan, France) by using the DNA Blood Kit II (PaxGene). Genomic DNA from *Potorous tridactylus*, *Pseudocheirus peregrinus*, *Perameles gunnii*, *Isodon macrourus*, *Dasyurus geoffroyi*, *Sminthopsis crassicaudata*, and *Didelphis virginiana* were provided by M. Nilsson and A. Janke, LOEWE Biodiversity and Climate Research Center. Genomic DNA from *Caluromys philander*, *Hyladelphys kalinowskii*, *Marmosops parvidens*, *Metachirus nudicaudatus*, *Philander opossum*, *Didelphis marsupialis*, *M. murina*, *M. demerarae*, and *M. brevicaudata* were extracted from tissues provided by F. Catzeflis, Collection de Tissus de Mammifères de Montpellier, Montpellier, France. Genomic DNA from *M. emiliae*, *M. theresa*, *M. adusta*, and *M. americana* were extracted from tissues provided by C. Conroy, Museum of Vertebrate Zoology, University of California, Berkeley, CA. Unless indicated otherwise, genomic DNAs were extracted from tissues conserved in ethanol. Genomic DNAs were purified by phenol–chloroform extraction.

**Real-Time RT-PCR.** *Env* mRNA expression was determined by qRT-PCR. Reverse transcription was performed with 100 ng of DNase-treated RNA as in ref. 1. PCR was carried out with 5  $\mu$ L of diluted (1:20) cDNA in a final volume of 25  $\mu$ L by using the FastSYBR Green PCR Master Mix (Qiagen) in an ABI PRISM 7000 sequence detection system. Primers are listed in Table S2. Transcript levels were normalized relative to the amount of the housekeeping RPLP0 gene (ribosomal protein P0). Samples (three samples per organ) were assayed in duplicate. RACE-PCR was performed with 100 ng of DNase-treated RNA, by using the SMARTer RACE cDNA Amplification Kit (Clontech).

**ISH.** Freshly collected *M. domestica* placentae were fixed in 4% (wt/vol) paraformaldehyde at 4 °C, embedded in paraffin, and serial

sections (7  $\mu$ m) were either stained with hematoxylin-eosin-saffron (HES) or used for ISH. For *syncytin-Opo1* and *env3*, four PCR-amplified fragments of ~400 bp (primers listed in Table S2) were cloned into pGEM-T Easy (Promega) for in vitro synthesis of the antisense and sense riboprobes, generated with SP6 RNA polymerase and digoxigenin 11-UTP (Roche Applied Science) after cDNA template amplification. Sections were processed, hybridized at 42 °C overnight with the pooled riboprobes, and incubated further at room temperature for 2 h with alkaline phosphatase-conjugated antidigoxigenin antibody Fab fragments (Roche Applied Science). Staining was revealed with nitroblue tetrazolium and 5-bromo-4-chloro-3-indoyl phosphate phosphatase alkaline substrates, as indicated by the manufacturer (Roche Applied Science).

**Electron Microscopy.** Tissues were fixed at least 1 h at 4 °C in 2.5% (vol/vol) glutaraldehyde in 0.1 M Sørensen phosphate buffer (pH 7.3), postfixed 2 h in aqueous 2% (wt/vol) osmium tetroxide, stained en bloc in 2% (wt/vol) uranyl acetate in 30% (vol/vol) methanol, dehydrated, and finally embedded in Epon. Analysis of the cellular organization of the tissue at the optical level was performed with 1- $\mu$ m semithin sections. Mounted on a microscope slide, the sections were de-embedded for 20 min at room temperature in sodium hydroxide-saturated ethanol and stained for 30 min at 56 °C with a 1% aqueous solution of thionine blue. After washings in absolute ethanol and xylene, the sections were mounted with Eukitt mounting medium. For ultrastructural observation, 70-nm ultrathin sections were stained with uranyl acetate and lead citrate and examined with a FEI Tecnai 12 microscope at 80 Kv.

**Syncytin-Opo1 Expression Vector and Fusion Assay.** The *syncytin-Opo1* fragments PCR-amplified from the genomic DNA of each *Monodelphis* species possessing the *syncytin-Opo1* ortholog were digested with EcoRI and MluI, and the PCR products were cloned into the pHCMV-G vector (GenBank accession no. AJ318514; gift from F.-L. Cosset, Ecole Normale Supérieure, Lyon, France). The *M. domestica syncytin-Opo1* gene was also synthesized and codon-optimized for its expression in human cells (GenCust; GenBank accession no. KM235330). Cell–cell fusion assays were performed by cotransfecting 293T cells ( $1\text{--}2 \times 10^5$  cells per well) with *syncytin-Opo1*-expressing vectors along with a vector expressing an nls-LacZ gene (0.5–1  $\mu$ g at a ratio of 1:1) using the Lipofectamine LTX and Plus reagent transfection kit (Invitrogen), before coculturing them (1:1 ratio) with a panel of target cells. At 24–48 h after transfection, cells were fixed and X-Gal-stained. Fusion index was calculated as  $[(N - S)/T] \times 100$ , where  $N$  is the number of nuclei in the syncytia,  $S$  is the number of syncytia, and  $T$  is the total number of nuclei counted. All cell lines are described in refs. 2 and 3, except for the opossum OK cell line (ATCC CRL-1840). They were grown in DMEM supplemented with 10% (vol/vol) FCS (Invitrogen), 100 mg/mL streptomycin, and 100 U/mL penicillin.

1. de Parseval N, Lazar V, Casella JF, Benit L, Heidmann T (2003) Survey of human genes of retroviral origin: Identification and transcriptome of the genes with coding capacity for complete envelope proteins. *J Virol* 77(19):10414–10422.

2. Dupressoir A, et al. (2005) Syncytin-A and syncytin-B, two fusogenic placenta-specific murine envelope genes of retroviral origin conserved in Muridae. *Proc Natl Acad Sci USA* 102(3):725–730.

3. Cornelis G, et al. (2012) Ancestral capture of syncytin-Car1, a fusogenic endogenous retroviral envelope gene involved in placentation and conserved in Carnivora. *Proc Natl Acad Sci USA* 109(7):E432–E441.

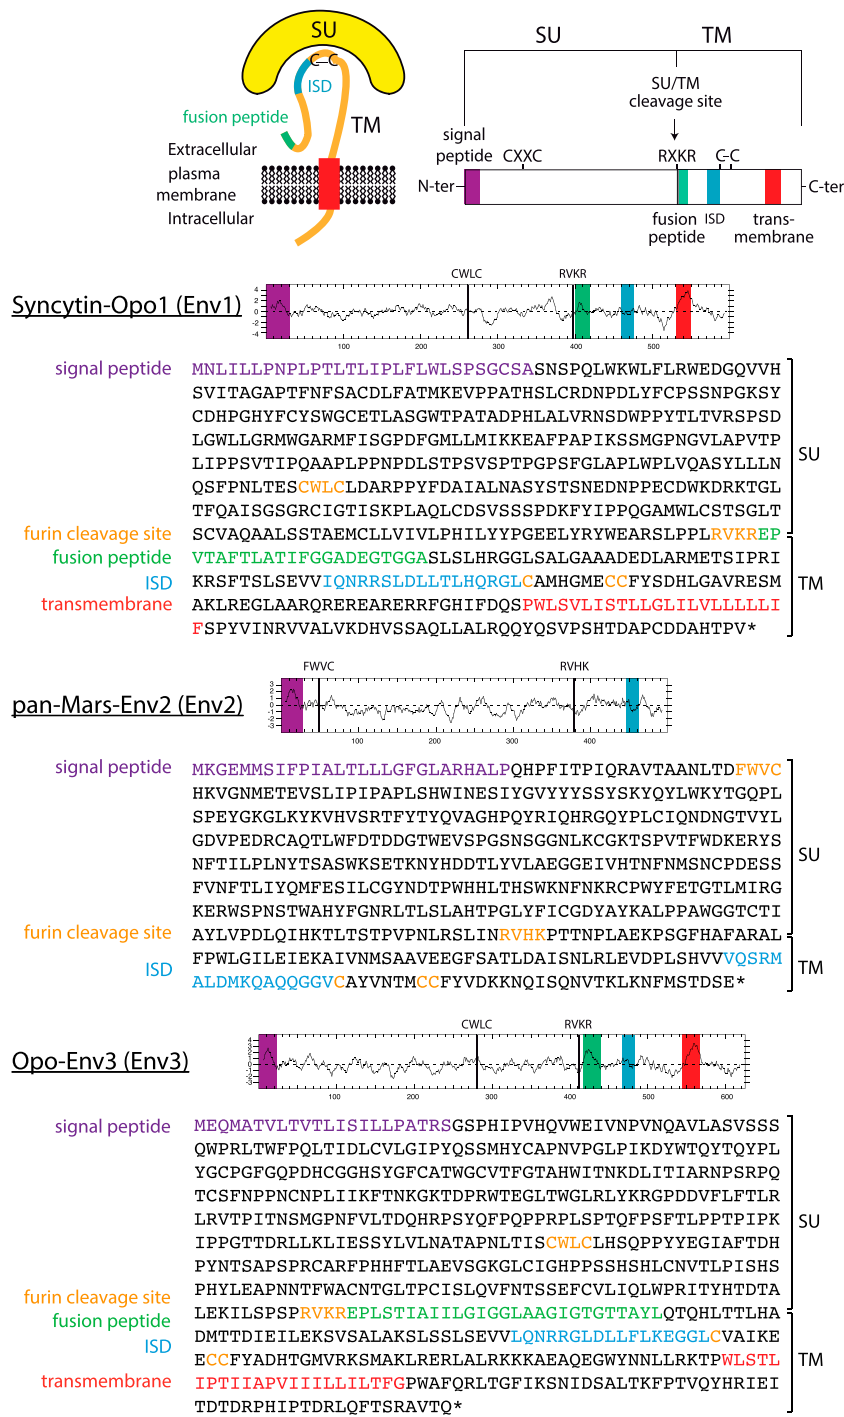

Fig. S1. Primary sequences of syncytin-Opo1, pan-Mars-Env2, and Opo-Env3. Primary amino acid sequences and characteristic structural features of the opossum Env proteins are provided, together with their hydrophobicity plots. The same color code and abbreviations as in Fig. 2 are used.

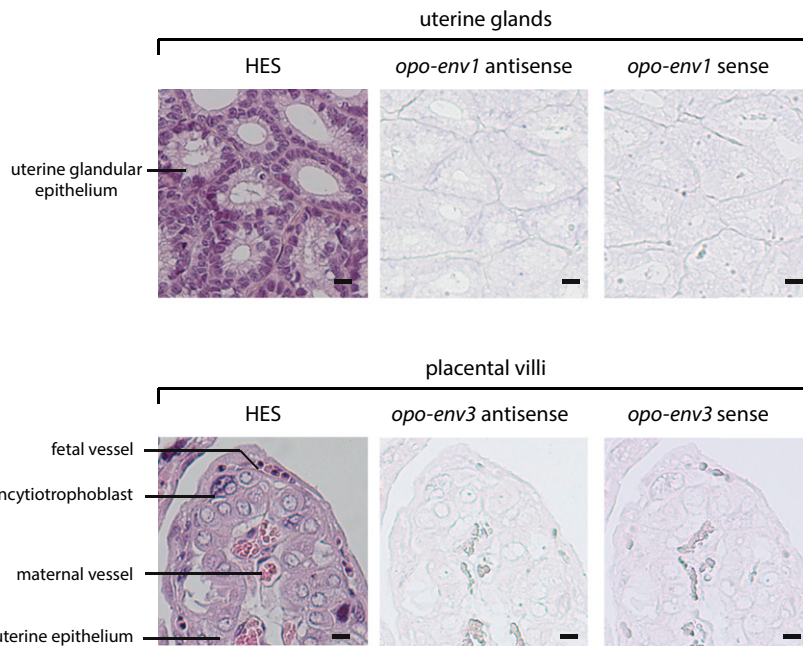

**Fig. S2.** Control ISH for lack of expression of *opo-env1* and *-env3* on uterine glands or placental villi sections, respectively. HES-stained sections of placenta and ISH on serial sections for *opo-env1* (Upper) or *opo-env3* (Lower) placental transcripts using digoxigenin-labeled antisense or sense riboprobes revealed with an alkaline phosphatase-conjugated antidigoxigenin antibody. Uterine glands (Upper) and placental villi (Lower) from the same hybridized sections as in Fig. 4. No staining is observed for either gene. (Scale bars: 10  $\mu\text{m}$ .)

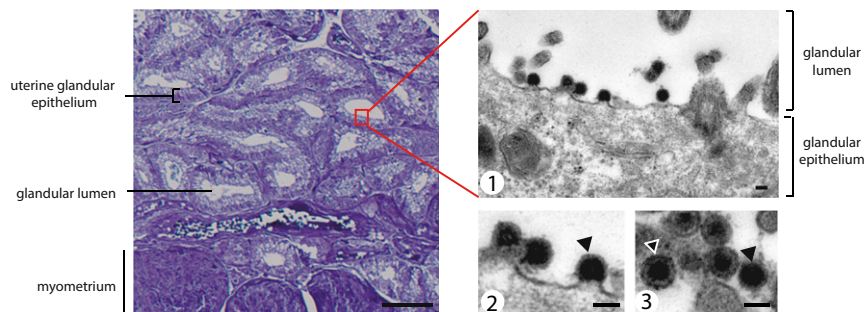

**Fig. S3.** Semithin sections and electron microscopy analysis of maternal uterine glands displaying retroviral-like particles budding in the glandular lumen. (Left) Semithin section of maternal uterine glands, with the uterine glandular epithelium, glandular lumen, and myometrium indicated. (Scale bars: 50  $\mu\text{m}$ .) (Right) Electron microscopy of viral "immature" particles budding at the cell surface of a glandular epithelial cell into the glandular lumen (1 and 2), and released viral particles either immature (black arrowhead) or mature (black and white arrowheads) with an icosahedral condensed core (3). (Scale bar: 100 nm.)

#### Syncytin-Opo1

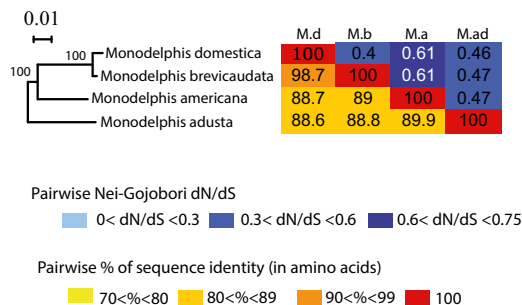

**Fig. S4.** Sequence conservation and evidence for purifying selection of syncytin-Opo1 in *Monodelphis* species. (Left) Syncytin-Opo1 phylogenetic tree determined by using amino acid alignment of the encoded proteins identified in Fig. 7, by the maximum-likelihood method. The horizontal branch length and scale indicate the percentage of amino acid substitutions. Percent bootstrap values obtained from 1,000 replicates are indicated at the nodes. (Right) Double-entry table for the pairwise percentage of amino acid sequence identity between the *syncytin-Opo1* gene among the indicated species (lower triangle) and the pairwise Nei-Gojobori nonsynonymous-to-synonymous mutation rate ratio (dN/dS; upper triangle). A color code is provided for both series of values.



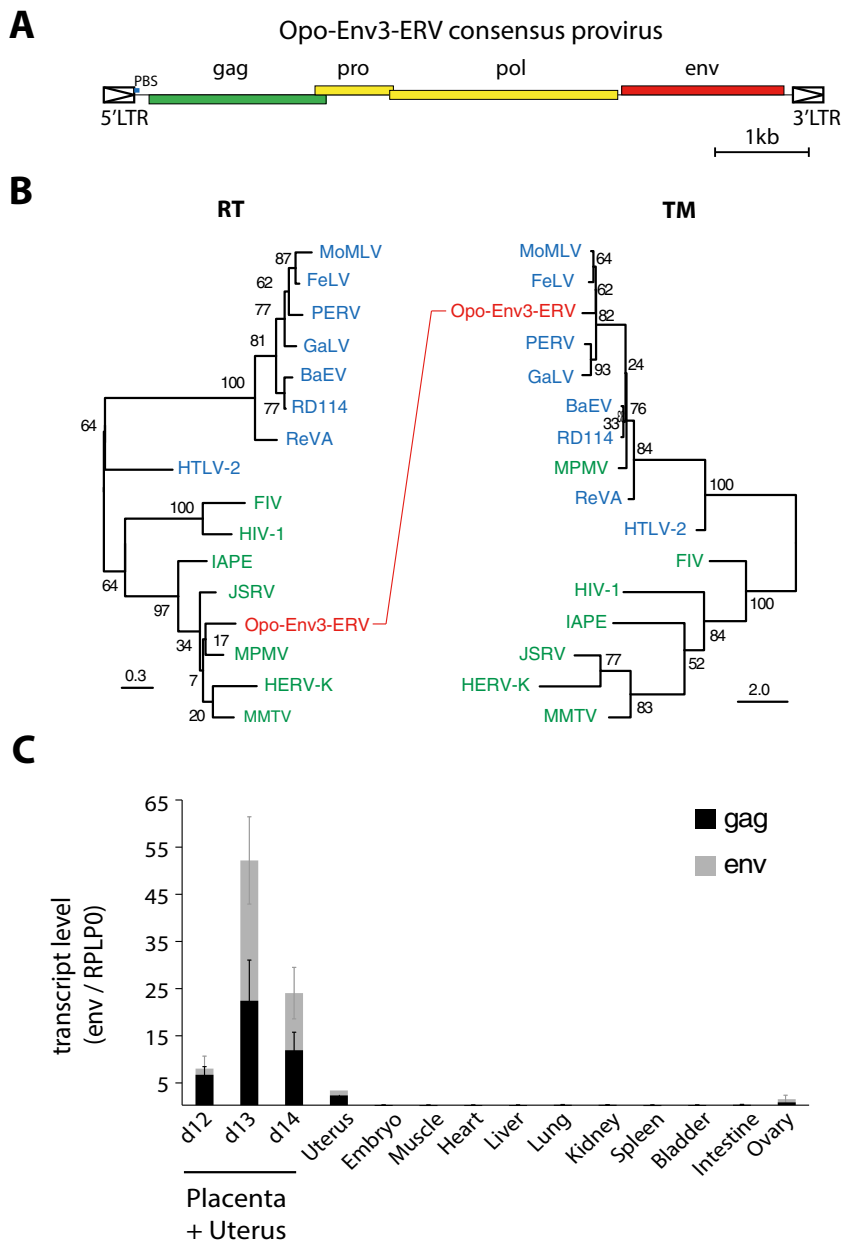

**Fig. 56.** Genetic structure and expression of the Opo-Env3-containing ERV. (A) Genetic structure of the consensus Opo-Env3-ERV provirus generated from the sequences of the 11 coding opo-env3 genes associated proviruses. This consensus provirus discloses full-length coding gag-pro-pol and env genes, as well as >92% identical LTRs and a PBS most closely related to the complementary sequence of the opossum Lys tRNA. (B) Opo-Env3-ERV is a mosaic retrovirus with a betaretrovirus *pol* gene and a gammaretrovirus *env* gene. The phylogenetic trees were determined as described in ref. 1 by using the catalytic domain sequences of the RT region of the indicated *pol* genes (Left) or the TM region of the corresponding *env* genes (Right) by the maximum-likelihood method, using the consensus sequence for the Opo-Env3-ERV genes. The horizontal branch length and scale indicate the percentage of amino acid substitutions. Percent bootstrap values obtained from 1,000 replicates are indicated at the nodes. (C) Real-time qRT-PCR analysis of the Opo-Env3-ERV *gag* (black) and *env* (gray) gene transcripts from the opossum (*M. domestica*). Transcript levels are expressed as the ratio of the expression level of each retroviral gene to that of the *RPLP0* control gene (Methods). Because of the high interpenetration of maternal and fetal tissues, placental and uterine tissues are analyzed as a whole at three gestational dates (day 12, 13, and 14). Values are the means of duplicates from three samples  $\pm$ SEM.

1. Bénit L, Dessen P, Heidmann T (2001) Identification, phylogeny, and evolution of retroviral elements based on their envelope genes. *J Virol* 75(23):11709–11719.

**Table S1. *M. domestica* Env protein coding sequences genomic coordinates**

| Env coding gene | Chromosome | Strand orientation | Coordinates         |
|-----------------|------------|--------------------|---------------------|
| Env1            | chr8       | -                  | 120625237-120627027 |
| Env2            | chr5       | -                  | 11260853-11262349   |
| Env3 (chr1)     | chr1       | +                  | 242599227-242600672 |
| Env3 (chr2-1)   | chr2       | -                  | 52421962-52423827   |
| Env3 (chr2-2)   | chr2       | -                  | 259517711-259519216 |
| Env3 (chr2-3)   | chr2       | -                  | 269216373-269217734 |
| Env3 (chr3)     | chr3       | +                  | 526989485-526991362 |
| Env3 (chr4)     | chr4       | -                  | 412041177-412042661 |
| Env3 (chr6-1)   | chr6       | +                  | 90633297-90635162   |
| Env3 (chr6-2)   | chr6       | +                  | 229324539-229326416 |
| Env3 (chr6-3)   | chr6       | +                  | 258334506-258336437 |
| Env3 (chrUn-1)  | chrUn      | +                  | 41432161-41434035   |
| Env3 (chrUn-2)  | chrUn      | +                  | 49353246-49355111   |
| Env4 (chr1)     | chr1       | +                  | 378680256-378681854 |
| Env4 (chr2-1)   | chr2       | -                  | 203870817-203872415 |
| Env4 (chr2-2)   | chr2       | +                  | 251101334-251102830 |
| Env4 (chr3-1)   | chr3       | -                  | 368911730-368914405 |
| Env4 (chr3-2)   | chr3       | +                  | 392091104-392093905 |
| Env4 (chr3-3)   | chr3       | +                  | 392097607-392100264 |
| Env4 (chr8)     | chr8       | -                  | 169483977-169485383 |
| Env5 (chr4-1)   | chr4       | +                  | 85997868-85999661   |
| Env5 (chr4-2)   | chr4       | +                  | 433659095-433660816 |
| Env6 (chr3)     | chr3       | -                  | 55370589-55371965   |
| Env6 (chr6)     | chr6       | -                  | 80144835-80146850   |
| Env7 (chr1)     | chr1       | -                  | 148492139-148494058 |
| Env7 (chr3)     | chr3       | +                  | 115079115-115080992 |
| Env7 (chr4-1)   | chr4       | -                  | 331702780-331704207 |
| Env7 (chr4-2)   | chr4       | +                  | 433659095-433660816 |
| Env8 (chr1-1)   | chr1       | -                  | 14632900-14634915   |
| Env8 (chr1-2)   | chr1       | -                  | 22458558-22460573   |
| Env8 (chr1-3)   | chr1       | -                  | 44922788-44924803   |
| Env8 (chr1-4)   | chr1       | -                  | 110916197-110918212 |
| Env8 (chr1-5)   | chr1       | -                  | 128115494-128117509 |
| Env8 (chr1-6)   | chr1       | +                  | 143726215-143728230 |
| Env8 (chr1-7)   | chr1       | -                  | 167895124-167897139 |
| Env8 (chr1-8)   | chr1       | +                  | 195056807-195058591 |
| Env8 (chr1-9)   | chr1       | -                  | 327576689-327578680 |
| Env8 (chr1-10)  | chr1       | -                  | 408682997-408684655 |
| Env8 (chr1-11)  | chr1       | +                  | 414372207-414374222 |
| Env8 (chr1-12)  | chr1       | -                  | 460528976-460530991 |
| Env8 (chr1-13)  | chr1       | +                  | 468658869-468660884 |
| Env8 (chr1-14)  | chr1       | +                  | 604520089-604522080 |
| Env8 (chr1-15)  | chr1       | +                  | 663273757-663275772 |
| Env8 (chr2-1)   | chr2       | -                  | 134198224-134200239 |
| Env8 (chr2-2)   | chr2       | +                  | 196643545-196645560 |
| Env8 (chr2-3)   | chr2       | -                  | 260753341-260754750 |
| Env8 (chr2-4)   | chr2       | -                  | 261525352-261527367 |
| Env8 (chr2-5)   | chr2       | +                  | 262350119-262354627 |
| Env8 (chr2-6)   | chr2       | -                  | 423468966-423470981 |
| Env8 (chr2-7)   | chr2       | -                  | 472324337-472326073 |
| Env8 (chr3-1)   | chr3       | -                  | 539612-541627       |
| Env8 (chr3-2)   | chr3       | -                  | 11971855-11973870   |
| Env8 (chr3-3)   | chr3       | -                  | 20146270-20151123   |
| Env8 (chr3-4)   | chr3       | -                  | 29779101-29781116   |
| Env8 (chr3-5)   | chr3       | +                  | 334022522-334024537 |
| Env8 (chr3-6)   | chr3       | -                  | 439830531-439832540 |
| Env8 (chr4-1)   | chr4       | -                  | 28979732-28981747   |
| Env8 (chr4-2)   | chr4       | +                  | 111516459-111518474 |
| Env8 (chr4-3)   | chr4       | +                  | 335872638-335874653 |
| Env8 (chr4-4)   | chr4       | +                  | 407540208-407542223 |
| Env8 (chr4-5)   | chr4       | +                  | 414607752-414609581 |
| Env8 (chr4-6)   | chr4       | -                  | 416947942-416949957 |
| Env8 (chr5-1)   | chr5       | +                  | 38428969-38430984   |

**Table S1. Cont.**

| Env coding gene | Chromosome | Strand orientation | Coordinates         |
|-----------------|------------|--------------------|---------------------|
| Env8 (chr5-2)   | chr5       | –                  | 103123482–103125497 |
| Env8 (chr5-3)   | chr5       | –                  | 153234093–153236108 |
| Env8 (chr5-4)   | chr5       | +                  | 213799757–213801772 |
| Env8 (chr6-1)   | chr6       | +                  | 17978209–17980224   |
| Env8 (chr6-2)   | chr6       | +                  | 34339376–34341391   |
| Env8 (chr6-3)   | chr6       | –                  | 79468511–79470526   |
| Env8 (chr8)     | chr8       | +                  | 155112001–155114016 |
| Env8 (chr-Un1)  | chrUn      | +                  | 64499316–64501331   |
| Env8 (chr-Un2)  | chrUn      | –                  | 65322701–65324716   |
| Env8 (chr-Un3)  | chrUn      | +                  | 82972007–82973659   |
| Env8 (chr-Un4)  | chrUn      | +                  | 99851075–99852727   |
| Env8 (chrX-1)   | chrX       | +                  | 25699343–25701358   |
| Env8 (chrX-2)   | chrX       | –                  | 25900813–25902828   |
| Env9            | chr3       | –                  | 504255693–504258332 |

Chromosome number and coordinates are given according to the reference Opossum genome (monDom5) from the University of California, Santa Cruz genome database ([genome-euro.ucsc.edu/cgi-bin/hgGateway?hgid=198434456\\_mYJHBqra3j3ET9GlcNBaOQ28GO3b&clade=mammal&org=Opossum&db=0](http://genome-euro.ucsc.edu/cgi-bin/hgGateway?hgid=198434456_mYJHBqra3j3ET9GlcNBaOQ28GO3b&clade=mammal&org=Opossum&db=0)).

**Table S2. List of primers**

|                                               | Primers                                           |
|-----------------------------------------------|---------------------------------------------------|
| <b>qRT-PCR</b>                                |                                                   |
| RPLP0-F                                       | 5'-AAG-ACA-GGG-CTA-CCT-GGA-A                      |
| RPLP0-R                                       | 5'-ATC-TGC-TGC-ATC-TGC-TTG-G                      |
| Opo-Env1-qRT-PCR-F                            | 5'-GAC-TGG-CCT-CCT-TAC-ACT-TT                     |
| Opo-Env1-qRT-PCR-R                            | 5'-CAT-AGA-GCT-TTT-GAT-TGG-G                      |
| Opo-Env2-qRT-PCR-F                            | 5'-GCT-GAA-GGG-GGA-GAG-ATT                        |
| Opo-Env2-qRT-PCR-R                            | 5'-GCC-AAG-GGG-TGT-CAT-TAT                        |
| Opo-Env3-qRT-PCR-F                            | 5'-CAC-TCC-CAT-CTT-TGT-AAT-GTT-AC                 |
| Opo-Env3-qRT-PCR-R                            | 5'-AGT-GTT-GCA-GGC-CCA-AAA                        |
| Opo-Env4-qRT-PCR-R                            | 5'-CTC-CTC-CTG-CTG-GCT-GTG                        |
| Opo-Env4-qRT-PCR-R                            | 5'-TCC-ATC-CAA-TTG-CAA-TTA-GA                     |
| Opo-Env5-qRT-PCR-F                            | 5'-GAT-ATA-GCT-AGG-CTA-GAA-TCC-TC                 |
| Opo-Env5-qRT-PCR-R                            | 5'-GGT-TAA-CAT-AGA-AGC-AGC-ATT                    |
| Opo-Env6-qRT-PCR-F                            | 5'-TCT-GAC-CAC-CAG-CTG-CTG                        |
| Opo-Env6-qRT-PCR-R                            | 5'-GCA-AGG-CAA-TTG-TTG-GGC                        |
| Opo-Env7-qRT-PCR-F                            | 5'-CAA-AAC-CCC-AGA-TGG-AAA                        |
| Opo-Env7-qRT-PCR-R                            | 5'-GGG-ATA-TGT-GTT-GGG-AAG-TTA-G                  |
| Opo-Env8-qRT-PCR-F                            | 5'-CGA-GAC-CAG-GAC-GAG-AAG                        |
| Opo-Env8-qRT-PCR-R                            | 5'-GAG-TAA-ATG-TAA-TGT-CAG-TGT-TC                 |
| Opo-Env9-qRT-PCR-F                            | 5'-CTG-TGT-GCT-TTG-GAC-ATT-CTA                    |
| Opo-Env9-qRT-PCR-R                            | 5'-GCT-CTA-TGA-AAG-TTC-TGT-TGG-TTA                |
| Opo-Env3-ERV-Gag-qRT-PCR-F                    | 5'-AAG-CCG-ACA-CCA-ATA-AAC-AGG                    |
| Opo-Env3-ERV-Gag-qRT-PCR-R                    | 5'-GTG-GTA-TTT-CCT-CCT-TCT-CAA                    |
| <b>5' RACE</b>                                |                                                   |
| Opo-Env1-5'RACE-R                             | 5'-GAT-TAG-GGT-TAG-GGT-TGG-AAG-AGG-GTT-G          |
| Opo-Env1-3'RACE-F                             | 5'-AGT-CCC-ACG-TCC-AAA-AAG-CAG-AA                 |
| Opo-Env3-5'RACE-Gag-R                         | 5'-ATA-CAT-ACG-CGT-ATT-TTA-TCA-GCC-TGG-AGT-GC     |
| Opo-Env3-5'RACE-Env-R                         | 5'-TGA-TCT-GGT-GGC-TGG-TAG-CAG-GAT-AGA-G          |
| <b>ISH</b>                                    |                                                   |
| Opo-Env1-ISH-1-F                              | 5'-GCC-CGC-ATG-TTT-ATC-TCC                        |
| Opo-Env1-ISH-1-R                              | 5'-TGT-CCT-TCC-AGT-CAC-ACT-CG                     |
| Opo-Env1-ISH-2-F                              | 5'-CCC-GCA-TCA-AAA-GGT-CCT                        |
| Opo-Env1-ISH-2-R                              | 5'-AAC-GGA-CTG-GTA-TTG-TTG-CC                     |
| Opo-Env1-ISH-3-F                              | 5'-ATC-CTT-CTT-CCC-AAC-CCT                        |
| Opo-Env1-ISH-3-R                              | 5'-AAA-GTG-TAA-GGA-GGC-CAG-TC                     |
| Opo-Env1-ISH-4-F                              | 5'-CTC-ACC-TTT-CAG-GCC-ATC                        |
| Opo-Env1-ISH-4-R                              | 5'-GTC-TCC-ATC-CTG-GCC-AAG                        |
| Opo-Env3-ISH-1-F                              | 5'-GGC-GAC-AGT-TCT-GAC-AGT-AAC                    |
| Opo-Env3-ISH-1-R                              | 5'-GAT-TAA-AGG-AGC-AGG-TCT-GAG                    |
| Opo-Env3-ISH-2-F                              | 5'-AAA-TTC-ACC-AAC-AAG-GG                         |
| Opo-Env3-ISH-2-R                              | 5'-GCA-GAG-GTG-TTA-TAA-GGG-TGA                    |
| Opo-Env3-ISH-3-F                              | 5'-CCC-ATC-TTT-GTA-ATG-TTA-C                      |
| Opo-Env3-ISH-3-R                              | 5'-TAC-AAC-TTC-TGA-GAG-GGA-GGA                    |
| Opo-Env3-ISH-4-F                              | 5'-GCC-TCG-ACC-TAC-TTT-TTT-TAA                    |
| Opo-Env3-ISH-4-R                              | 5'-AGA-CGA-TCA-GTA-GGG-ATG-TGT                    |
| <b>Amplification of Opo-Env in marsupials</b> |                                                   |
| syncytin-Opo1-locus-F                         | 5'-CRC-TGR-AAT-KTA-AAG-RGA-TCA-G                  |
| syncytin-Opo1-locus-R                         | 5'-ATA-CAT-ACG-CGT-GCC-CTT-TAC-ATT-TTC-CAA-GAA-TA |
| syncytin-Opo1-ORF-F                           | 5'-ATA-CAT-GAA-TTC-ATC-CAG-CAA-ACC-CCC-TGA        |
| syncytin-Opo1-ORF-R                           | 5'-ATA-CAT-ACG-CGT-GCA-ATC-TCC-GCT-TCT-TCT-AC     |
| syncytin-Opo1-Int-F                           | 5'-CTC-TGC-TTC-AAA-TTC-ACC-TC                     |
| syncytin-Opo1-Int-R                           | 5'-ATG-CCT-CCT-TCT-TAA-TCA                        |
| Opo-Env3-ORF-F                                | 5'-ATA-CAT-CTC-GAG-AAT-ATC-CCC-TCC-CCT-TAA-T      |
| Opo-Env3-ORF-R                                | 5'-ATA-CAT-ACG-CGT-AGG-CTA-CAC-AGG-GGG-AGT        |
| Opo-Env3-locus-chr2-F                         | 5'-GAC-CAC-AGG-ATG-ATA-AAG-TTT                    |
| Opo-Env3-locus-chr2-R                         | 5'-CTA-TGC-TTT-TTT-TGT-TCC-TG                     |
| Opo-Env3-Int-F                                | 5'-AAA-TTC-ACC-AAC-AAG-GG                         |
| Opo-Env3-Int-R                                | 5'-TAC-AAC-TTC-TGA-GAG-GGA-GGA                    |
| Opo-Env2-ORF-F                                | 5'-TAT-GRA-ATC-CYK-CCC-TTC                        |
| Opo-Env2-Locus-R                              | 5'-ATA-CAT-ACG-CGT-TAC-AGT-ACT-TGT-TAA-GCA        |



**Table S3. Fusogenic activity of Syncytin-Opo1**

| Species | Cell    | Syncytin-Opo1 cell-cell fusion efficiency |                               |                        |                  |                     | No Env |
|---------|---------|-------------------------------------------|-------------------------------|------------------------|------------------|---------------------|--------|
|         |         | <i>M. domestica</i>                       | <i>M. domestica</i> optimized | <i>M. brevicaudata</i> | <i>M. adusta</i> | <i>M. americana</i> |        |
| Human   | 293T    | -                                         | -                             | -                      | -                | -                   | -      |
|         | HeLa    | -                                         | -                             | -                      | -                | -                   | -      |
|         | HuH7    | -                                         | -                             | -                      | -                | -                   | -      |
|         | SHSY-5Y | -                                         | -                             | -                      | -                | -                   | -      |
| Mouse   | MCA205  | -                                         | -                             | -                      | -                | -                   | -      |
|         | WOP     | -                                         | -                             | -                      | -                | -                   | -      |
| Rat     | 208F    | -                                         | -                             | -                      | -                | -                   | -      |
| Hamster | A23     | +                                         | ++                            | ++                     | ++               | ++                  | -      |
| Cat     | G355.5  | -                                         | -                             | -                      | -                | -                   | -      |
| Dog     | MDCK    | -                                         | -                             | -                      | -                | -                   | -      |
| Opossum | OK      | -                                         | -                             | -                      | -                | -                   | -      |

Fusogenic activity of the indicated Syncytin-Opo1 on a panel of target cells, including human, rodent, carnivoran, and opossum cells. Same experimental conditions as in Fig. 5. Fusion index was calculated as  $[(N - S)/T] \times 100$ , where  $N$  is the number of nuclei in the syncytia,  $S$  is the number of syncytia, and  $T$  is the total number of nuclei counted, with the following scale: -, <5; +, 5-10; ++, 10-30.
